# Supplementary material
Source: PubMed Central journal article supplement (PMC8050211)
Supplement: 11357_2020_312_MOESM1_ESM.pdf [file 11357_2020_312_MOESM1_ESM.pdf]

**Effects of Sleep Deprivation on Endothelial Function in Adult Humans: A Systematic Review**

*Geroscience*

**Brady J. Holmer<sup>a</sup>, Stephanie S. Lapierre<sup>a</sup>, Danielle E. Jake-Schoffman<sup>b</sup>, PhD, Demetra D. Christou, PhD<sup>a</sup>**

**<sup>a</sup>Department of Applied Physiology and Kinesiology, College of Health and Human Performance, University of Florida, 1864 Stadium Road, Gainesville, FL, 32611-8205, USA**

**<sup>b</sup>Department of Health Education and Behavior, College of Health and Human Performance, University of Florida, 1864 Stadium Road, Gainesville, FL, 32611-8205, USA**

**Corresponding author:**

Demetra Christou, PhD, FAHA

University of Florida

1864 Stadium Road

Gainesville, FL, 32611-8205, USA

email: [ddchristou@ufl.edu](mailto:ddchristou@ufl.edu)

**Supplementary Table 1** Studies excluded from the systematic review at full-text screening

| <b>Citation</b>                    | <b>Title</b>                                                                                                           | <b>Reason for exclusion</b>                            |
|------------------------------------|------------------------------------------------------------------------------------------------------------------------|--------------------------------------------------------|
| <b>Akdemir et al. 2013 [97]</b>    | Impact of acute sleep deprivation on aortic elastic properties in healthy workers                                      | Did not assess endothelial function                    |
| <b>Anujou et al. 2015 [98]</b>     | Relationship between short sleep duration and cardiovascular risk factors in a multi-ethnic cohort – the HELIUS study  | Did not assess endothelial function                    |
| <b>Anujou et al. 2016 [99]</b>     | Relationship between sleep duration and arterial stiffness in a multi-ethnic population: The HELIUS study              | Did not assess endothelial function                    |
| <b>Cao et al. 2016 [100]</b>       | Association between sleep condition and arterial stiffness in Chinese adult with nonalcoholic fatty liver disease      | Did not assess endothelial function                    |
| <b>Chen et al. 2017 [101]</b>      | Association between short sleep duration and carotid atherosclerosis modified by age in a Chinese community population | Did not assess endothelial function                    |
| <b>Cooper et al. 2014 [102]</b>    | Endothelial function and sleep: associations of flow-mediated dilation with perceived sleep quality and REM sleep      | Did not measure sleep duration                         |
| <b>Culver et al. 2020 [103]</b>    | Self-reported sleep quality is associated with central hemodynamics in healthy individuals                             | Did not measure sleep duration                         |
| <b>Dominguez et al. 2019 [104]</b> | Association of sleep duration and quality with subclinical atherosclerosis                                             | Did not assess endothelial function                    |
| <b>Hijmans et al. 2019 [105]</b>   | Insufficient sleep is associated with a pro-atherogenic circulating microRNA signature                                 | Did not assess endothelial function                    |
| <b>Kim et al. 2015 [106]</b>       | Sleep duration, sleep quality, and markers of subclinical arterial disease in healthy men and women                    | Did not measure sleep duration or endothelial function |
| <b>Logan et al. 2018 [107]</b>     | Actigraphy based sleep characteristics and aortic stiffness: The Multi-Ethnic Study of Atherosclerosis (MESA)          | Did not assess endothelial function                    |

**Supplementary Table 1 (Continued)**

| <b>Citation</b>                         | <b>Title</b>                                                                                                                                            | <b>Reason for exclusion</b>         |
|-----------------------------------------|---------------------------------------------------------------------------------------------------------------------------------------------------------|-------------------------------------|
| <b>Martinez-Gomez et al. 2011 [108]</b> | Sleep duration and emerging cardiometabolic risk markers in adolescents. The AFINOS Study                                                               | Study conducted in adolescents      |
| <b>Morita et al. 2017 [109]</b>         | Inverse relationship between sleep duration and cardio-ankle vascular index in children                                                                 | Study conducted in children         |
| <b>Nagai et al. 2013 [110]</b>          | Sleep duration and insomnia in the elderly: associations with blood pressure variability and carotid artery remodeling                                  | Did not assess endothelial function |
| <b>Sands et al. 2012 [111]</b>          | Short sleep duration is associated with carotid intima-media thickness among men in the coronary artery risk development in young adults (CARDIA) study | Did not assess endothelial function |
| <b>Slomko et al. 2018 [85]</b>          | Hemodynamic, autonomic, and vascular function changes after sleep deprivation for 24, 28, and 32 hours in healthy men                                   | Did not assess endothelial function |
| <b>Tsai et al. 2014 [112]</b>           | Long sleep duration associated with a higher risk of increased arterial stiffness in males                                                              | Did not assess endothelial function |
| <b>Weil et al. 2011 [113]</b>           | Habitual short sleep duration and circulating endothelial progenitor cells                                                                              | Did not assess endothelial function |
| <b>Yoshioka et al. 2011 [114]</b>       | Relation between self-reported sleep duration and arterial stiffness: a cross-sectional study of middle-aged Japanese civil servants                    | Did not assess endothelial function |
| <b>Zonoozi et al. 2017 [115]</b>        | Self-reported sleep duration and napping, cardiac risk factors, and markers of subclinical vascular disease: cross-sectional study in older men         | Did not assess endothelial function |
